# Supplementary material for: Text mining for the biocuration workflow
Source: Oxford University Press journal article supplement (doi:10.1093/database/bas020), 2012-04-18
Supplement: bas020_Supplementary_Data.zip [file bas020_Supplementary_Data.zip]

Archive with 3 entries (3 files):
- Appendix_B_Biocuration_survey-clean.docx
- Appendix_A-Workflows-clean.pdf
- AppendixC_Survey_results.pdf
