# Supplementary material for: Text mining for the biocuration workflow
Source: Oxford University Press journal article supplement (doi:10.1093/database/bas020), 2012-04-18
Supplement: bas020_Supplementary_Data.zip [file bas020_Supplementary_Data.zip › Appendix_B_Biocuration_survey-clean.docx]

# Appendix B: BioCuration Survey – Description and Analysis

The successful interaction with the biocuration community prior to and during the literature mining workshop prompted us to run a survey among database curators and developers to better document the text mining requirements from this community. The survey consisted of four sections that collected information about: 1) affiliation and description of the curation task; 2) key aspects of the curation process that may be related to text mining tasks, such as the article selection criteria, the parts of an article where the annotation is found, and bio-entity normalization; 3) the role of text mining in such processes; and 4) curator’s pressing needs in order to guide the future development of text mining tools or modification of existing ones.

## Section 1- Participating groups

The participants included database curators or their team leads, and participants of the Literature mining workshop at the 3rd International Biocuration Meeting (mostly developers involved in the evaluation and adaptation of text mining tools for curators). There were 30 participants in all, but some of the questions could be skipped. In order to be counted in the survey, the participant had to respond to more than one section.

## Section 2-The curation process

This section included questions about the article selection criteria, preference of full-length articles vs. abstracts, gene normalization task, and use of controlled vocabularies.

*1-What are the criteria for selecting articles for curation?*

Based on the survey, article selection for curation still heavily relies on PubMed searches (topic, bio-entity or organism based search). However, curators (75% of surveyed participants) claimed to use or have used text mining tools at some point for literature curation, with tools ranging from open source (Textpresso , iHOP, BioMinT, PubSearch, eGIFT) to in-house developed tools (@NOTE), and/or commercial packages (Quosa) (see question 3 in survey, Appendix C).

*2-Is the annotation extracted from abstracts or full-length articles?*

The use of full-length article for extracting annotation is the norm for most participants (72.4%). Most significantly, tables and supplemental material constitute integral sources for annotation extraction. This is the case for the protein-protein interaction databases where the interaction evidence is derived primarily from these. Similarly, table and figures are key to capturing kinetic data, phenotypic data, genotypes, and evidence for gene ontology annotation (see questions 4 and 5 in survey).

*3-How do you link a bio-entity from an abstract/full-length article to a database record? (What kind of attributes or contextual information do you use, e.g., name, symbol, organism source, molecular weight, and sequence length)*

For the gene normalization task, most participants use gene/protein names and symbol plus organism information as a first pass to link a bio-entity to a database record. Other contextual information used includes identifiers, sequence, open reading frames (ORFs), locus names, and genetic markers (see question 6 in survey).

*4-Are you using controlled vocabularies or ontologies in the annotation?*

Controlled vocabularies are used to a large extent, mainly OBO ontologies, but in some cases other vocabularies are used, such as the NCBI organism taxonomy and/or in-house controlled vocabularies (such as keywords, and disease) (see question 7 in survey).

## Section 3- Role of text mining in the curation process

This section aimed at collecting information about the experience of curators with text mining tools.

*5-Have you tried to use text mining tools at any curation step?*

46% of participants in the survey are currently using some text mining tool in their curation process. Textpresso seems to be the preferred tool (7 out of 18); it is or has been used by MODs (such as WormBase, SGD, TAIR and RGD) as well as for protein-protein interaction databases (MINT and BioGrid), though in the latter case not for identifying PPIs (see question 8 in survey).

*6- What would be (or is currently) the main usage for text mining tools?*

The text mining tools are mostly used for the selection or prioritization of relevant articles for curation, extraction of relations among entities (e.g., identification of interacting proteins) and identification of underlying evidence in the text for an annotation (see question 9 in survey).

*7- How would you use text mining tools in curation?*

This question aimed at elucidating preferred mode of adoption of a text mining tool (batch mode, interactive or both). A combination of batch and interactive tools would be desired by majority of participants. The batch process would be used for article retrieval and prioritization of most relevant documents, and also for database updates. A user-friendly interactive interface for the curator would be used to show, for example, some categorization of articles based on pre-determined topics, including features such as text marked-up with the vocabulary of interest (selected by curator) and suggested GO annotations (see question 10 in survey).

*8-What are the main obstacles in using text mining tools?*

Finally, the results of the survey suggest that the prevalence of abstract-only mining tools, low precision, low recall, and difficult integration into the curation workflow are among the main obstacles for implementing text mining tools (see question 11 in survey).

## Section 4- Curators needs

### *9- What are the main bottlenecks in your current curation process and where could text mining tools help?*

### Despite the diversity among the curation workflows most of the participants reported text mining-related tasks as a time consuming step. Among these are: article prioritization, finding the terms of interest for annotation, gene normalization, and database update with newly published literature. The majority of participants identified three themes as pressing issues for text mining tools: (i) integration of text mining tools into the curation pipeline with user-friendly interfaces, (ii) development of (or modification of) tools to support text mining of full-length articles in the formats most publishers use for online dissemination (PDF and/or HTML), and (iii) development/improvement of mark-up tools for gene/protein mentions and support for selection of appropriate terms from an ontology or terminology. In this regard, there were also some suggestions to press journals for use of standardized nomenclature whenever possible, or marking up articles for known entities. (see questions 12 and 13 in survey).

The results of this survey (anonymized) can be found in Appendix C.
